# Supplementary material for: Effect of heterocyclic and non-heterocyclic units on FDT-based hole transport materials for efficient perovskite solar cells: a DFT study
Source: Royal Society of Chemistry journal article supplement (doi:10.1039/d4cp01317d), 2024-01-01
Supplement: d4cp01317d2.pdf [file d4cp01317d2.pdf]

# **Effect of Heterocyclic and Non-Heterocyclic Units on FDT-Based Hole Transport Materials for Efficient Perovskite Solar Cells: A DFT Study**

Mohd Shavez and S. Mahapatra\*

*School of Chemistry, University of Hyderabad, Hyderabad 500046, India*

E-mail: [susanta.mahapatra@uohyd.ac.in](mailto:susanta.mahapatra@uohyd.ac.in)

## List of Figures

|    |                                                                                                                 |    |
|----|-----------------------------------------------------------------------------------------------------------------|----|
| S1 | Optimized ground state geometries for <b>FDT-2</b> and <b>FDT-3</b> calculated at BMK/6-31G(d,p) level. . . . . | 5  |
| S2 | Optimized ground state geometries for <b>FDT-4</b> and <b>FDT-5</b> calculated at BMK/6-31G(d,p) level. . . . . | 6  |
| S3 | Optimized ground state geometries for <b>FDT-6</b> and <b>FDT-7</b> calculated at BMK/6-31G(d,p) level. . . . . | 7  |
| S4 | The spatial orbital distributions of HOMOs and LUMOs of <b>FDT-4</b> to <b>FDT-7</b> . . . . .                  | 8  |
| S5 | The $\pi$ -stacked structures of two adjacent fragments for <b>FDT-3</b> to <b>FDT-5</b> . . . . .              | 9  |
| S6 | The $\pi$ -stacked structures of two adjacent fragments for <b>FDT-6</b> to <b>FDT-7</b> . . . . .              | 10 |

## List of Tables

|    |                                                                                                                                                                                             |   |
|----|---------------------------------------------------------------------------------------------------------------------------------------------------------------------------------------------|---|
| S1 | Energies of HOMO and LUMO for <b>FDT</b> obtained in dichloromethane solvent using B3LYP, PBE0, HSE06, and BMK functionals and 6-31Gd,p) basis set. All the energies are in the eV. . . . . | 4 |
| S2 | Optimal range separation parameters ( $\omega$ ) for all HTMs. . . . .                                                                                                                      | 4 |

Table S1: Energies of HOMO and LUMO for **FDT** obtained in dichloromethane solvent using B3LYP, PBE0, HSE06, and BMK functionals and 6-31Gd,p) basis set. All the energies are in the eV.

| <b>FDT</b>        | B3LYP | PBE0  | HSE06 | BMK   | Expt. <sup>1</sup> |
|-------------------|-------|-------|-------|-------|--------------------|
| $E_{\text{HOMO}}$ | -4.50 | -4.72 | -4.35 | -5.15 | -5.16              |
| $E_{\text{LUMO}}$ | -1.80 | -2.02 | -1.66 | -2.45 | -2.28              |

Table S2: Optimal range separation parameters ( $\omega$ ) for all HTMs.

| HTMs     | <b>FDT</b> | <b>FDT-1</b> | <b>FDT-2</b> | <b>FDT-3</b> | <b>FDT-4</b> | <b>FDT-5</b> | <b>FDT-6</b> | <b>FDT-7</b> |
|----------|------------|--------------|--------------|--------------|--------------|--------------|--------------|--------------|
| $\omega$ | 0.006      | 0.001        | 0.001        | 0.001        | 0.001        | 0.001        | 0.001        | 0.001        |

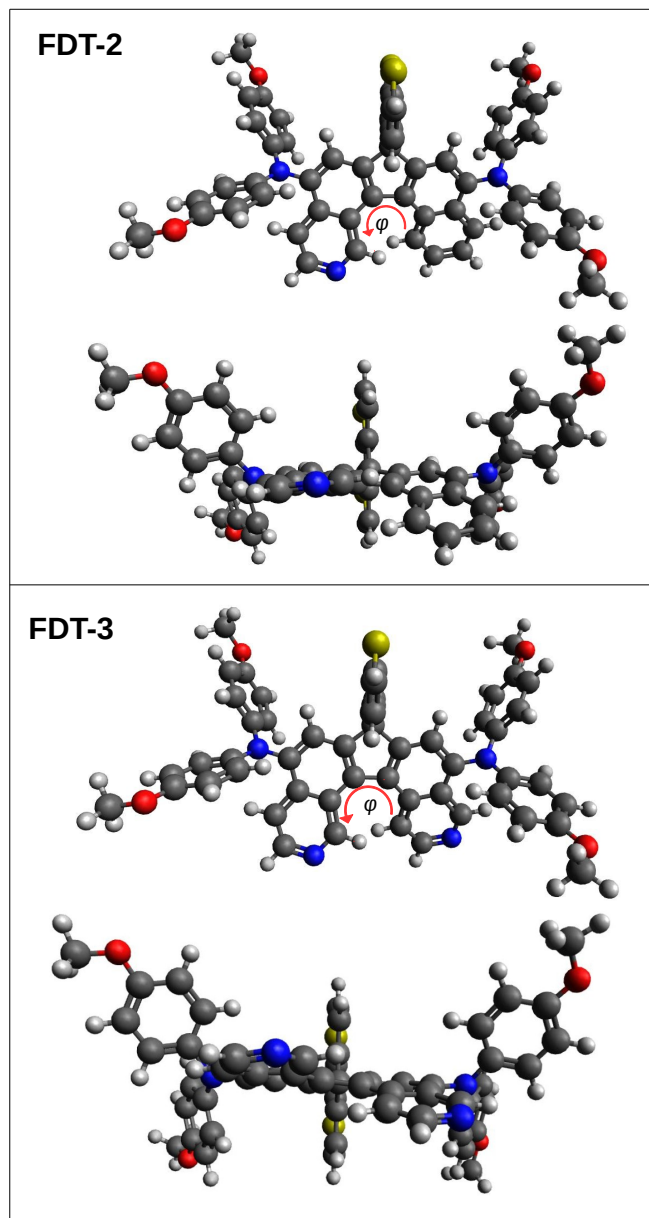

Figure S1: Optimized ground state geometries for **FDT-2** and **FDT-3** calculated at BMK/6-31G(d,p) level.

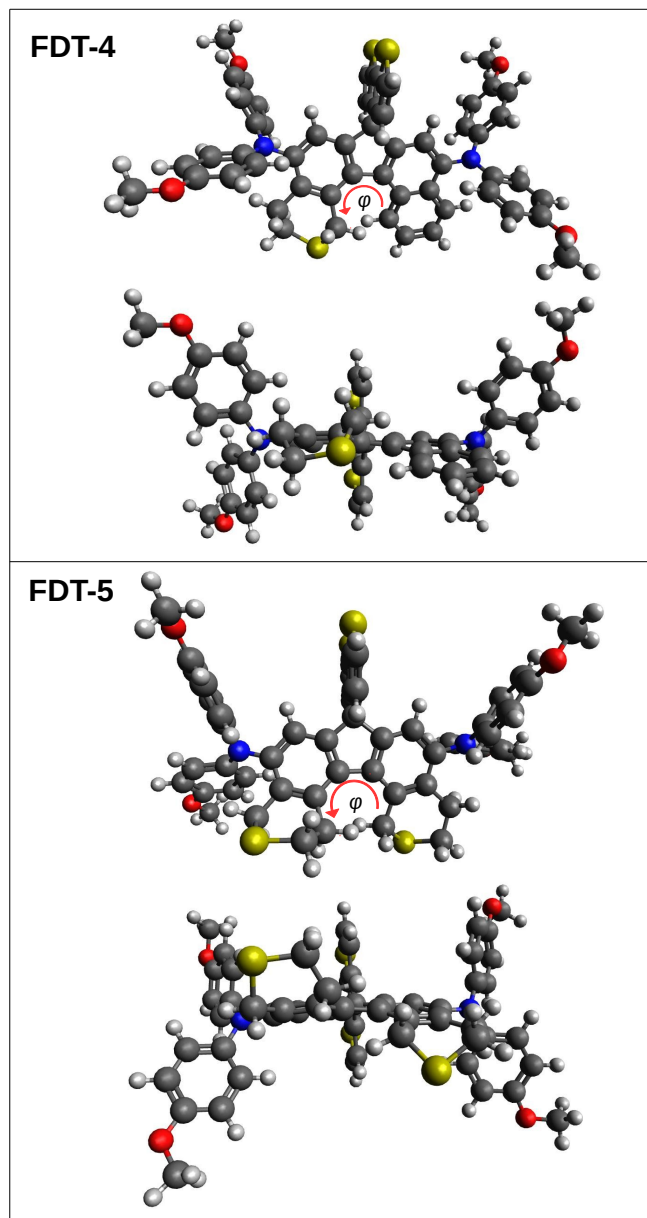

Figure S2: Optimized ground state geometries for **FDT-4** and **FDT-5** calculated at BMK/6-31G(d,p) level.

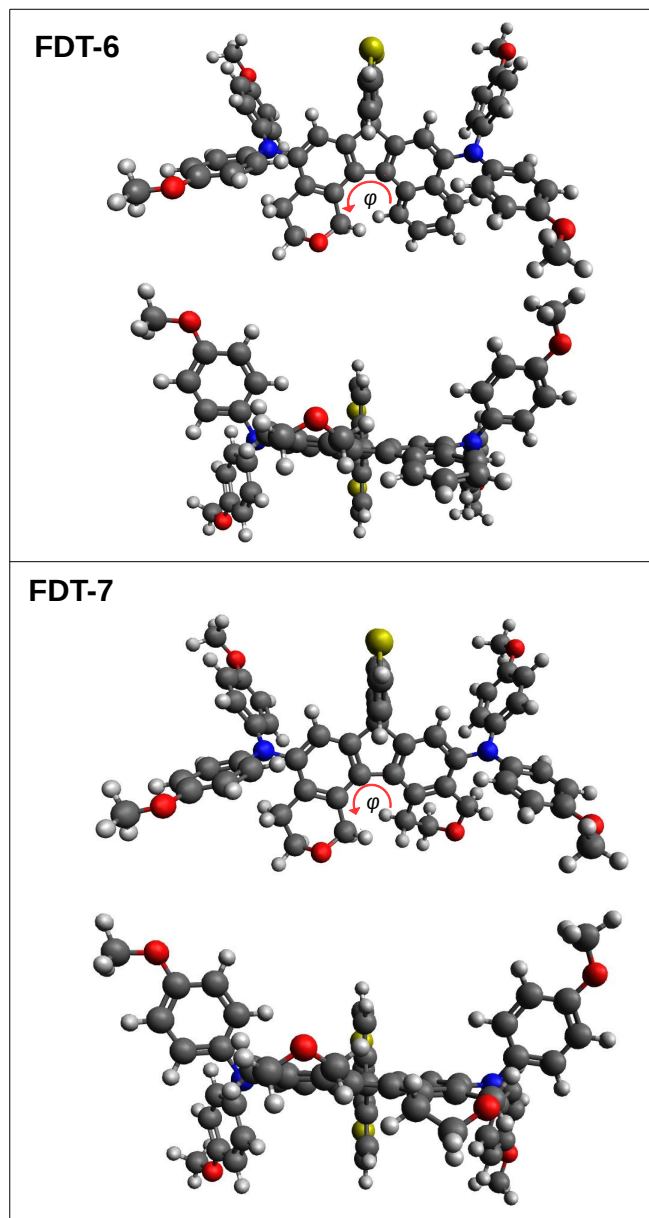

Figure S3: Optimized ground state geometries for **FDT-6** and **FDT-7** calculated at BMK/6-31G(d,p) level.

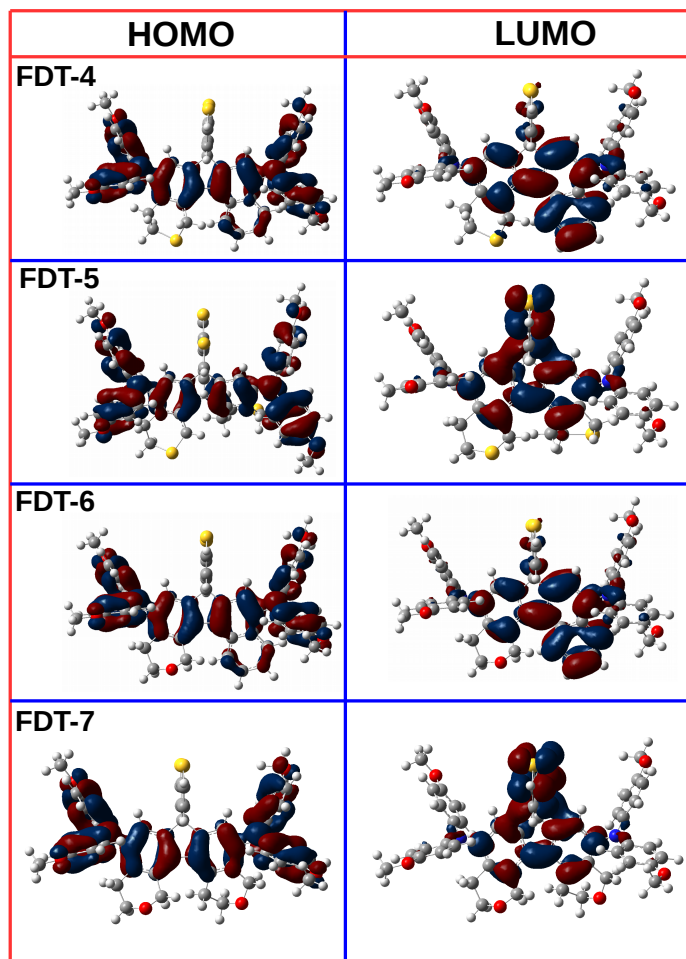

Figure S4: The spatial orbital distributions of HOMOs and LUMOs of **FDT-4** to **FDT-7** .



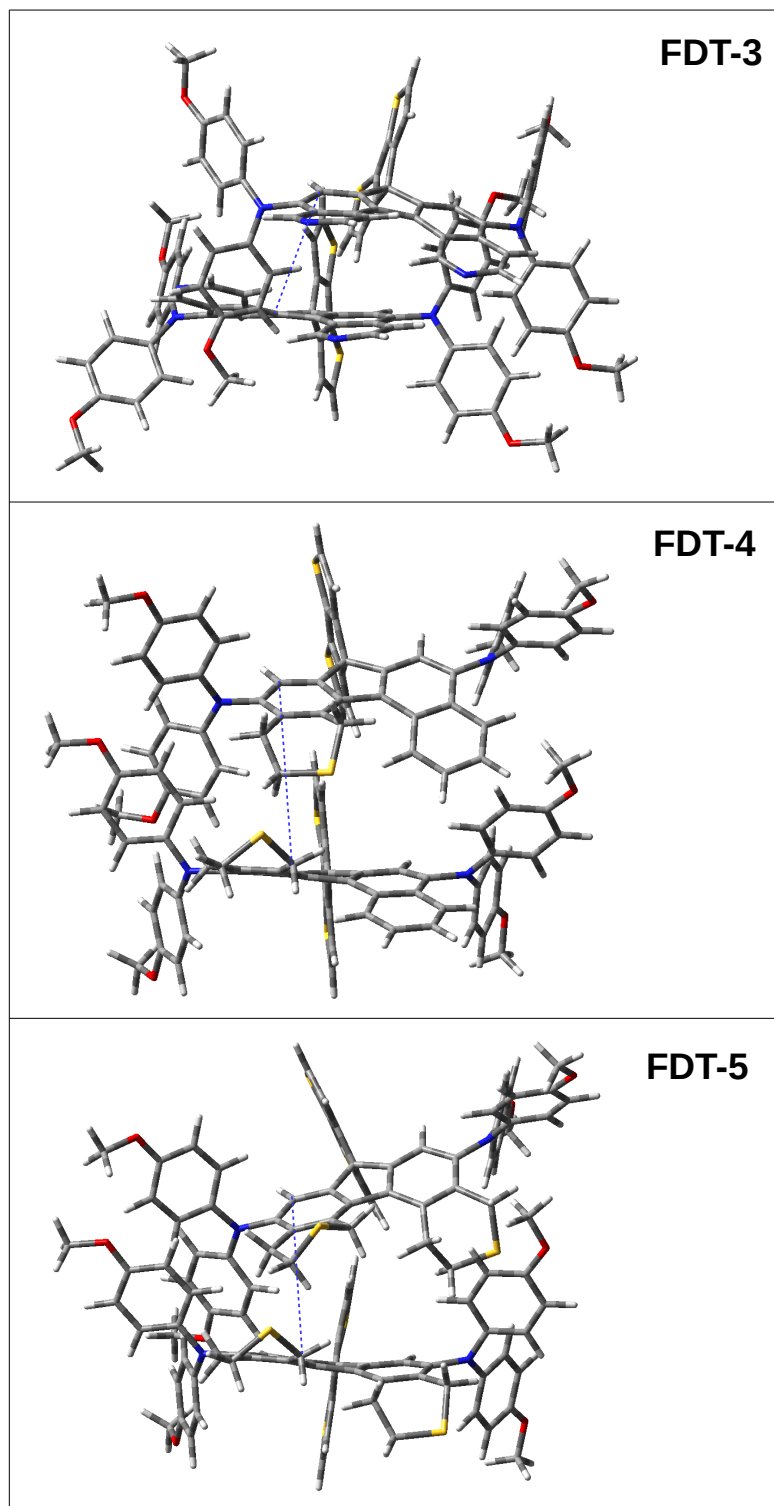

Figure S5: The  $\pi$ -stacked structures of two adjacent fragments for **FDT-3** to **FDT-5**.

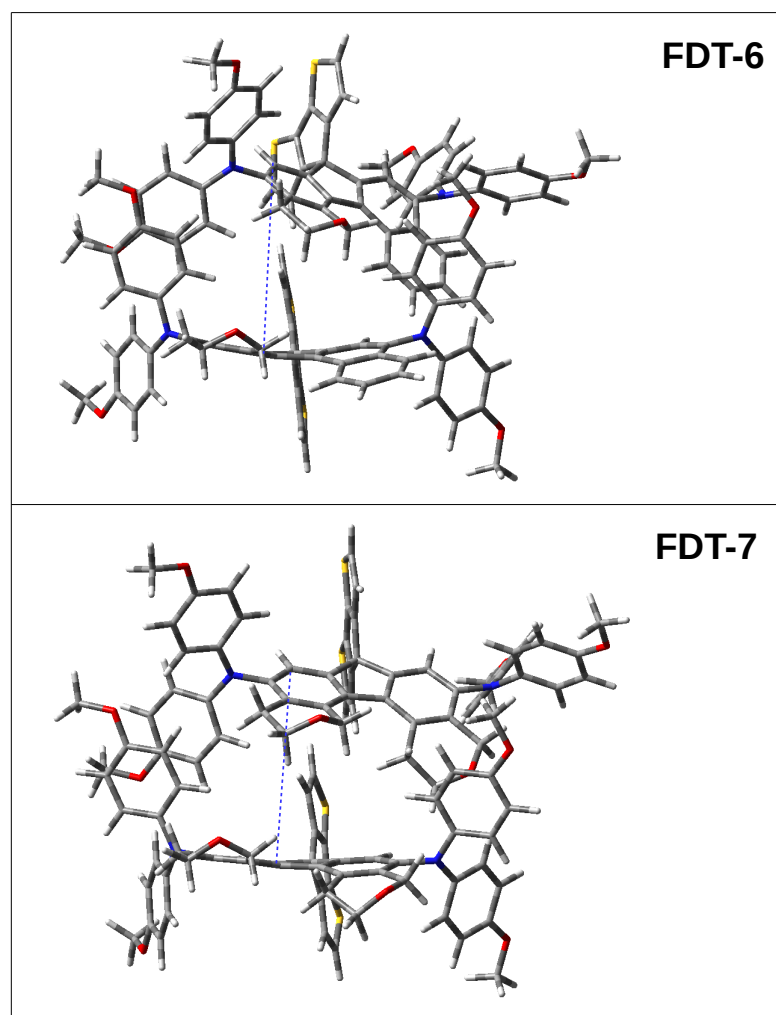

Figure S6: The  $\pi$ -stacked structures of two adjacent fragments for **FDT-6** to **FDT-7**.

## References

- (1) Saliba, M.; Orlandi, S.; Matsui, T.; Aghazada, S.; Cavazzini, M.; Correa-Baena, J.-P.; Gao, P.; Scopelliti, R.; Mosconi, E.; Dahmen, K.-H., et al. A molecularly engineered hole-transporting material for efficient perovskite solar cells. *Nat. Energy* **2016**, *1*, 1–7.
