# Supplementary figures and images for: Effect of heterocyclic and non-heterocyclic units on FDT-based hole transport materials for efficient perovskite solar cells: a DFT study
Source: Royal Society of Chemistry journal article supplement (doi:10.1039/d4cp01317d), 2024-01-01

FDT-4

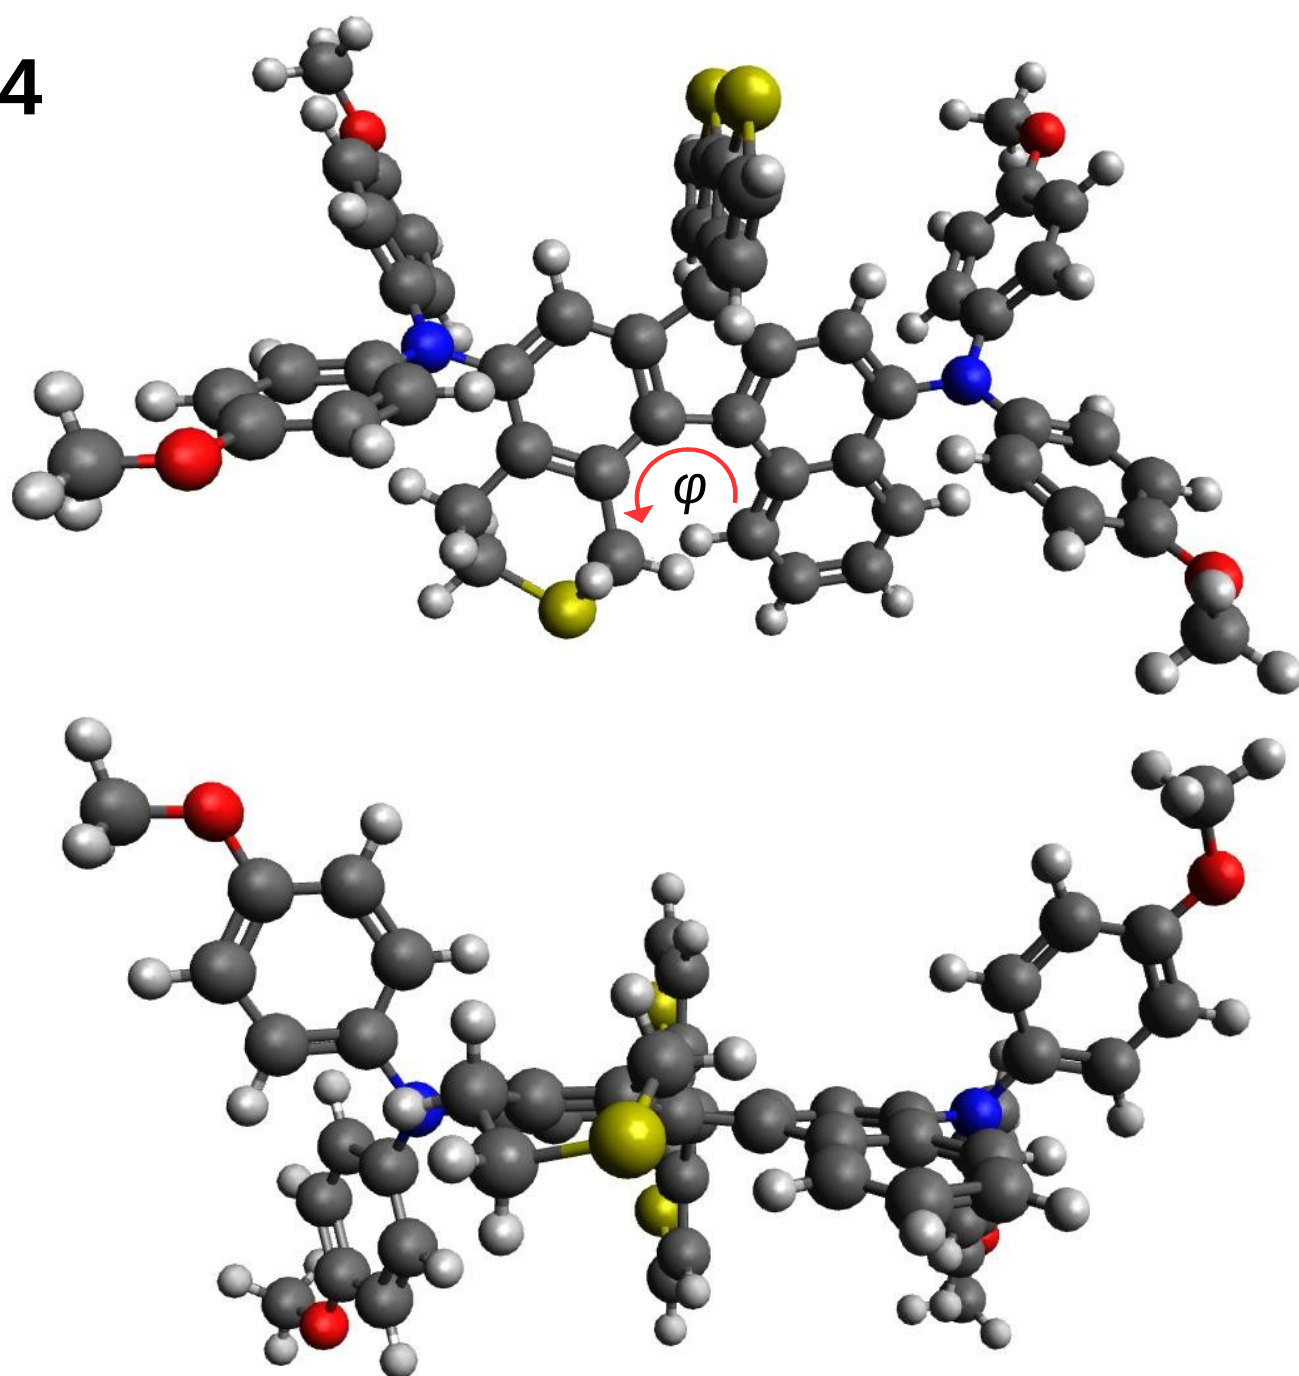

FDT-5

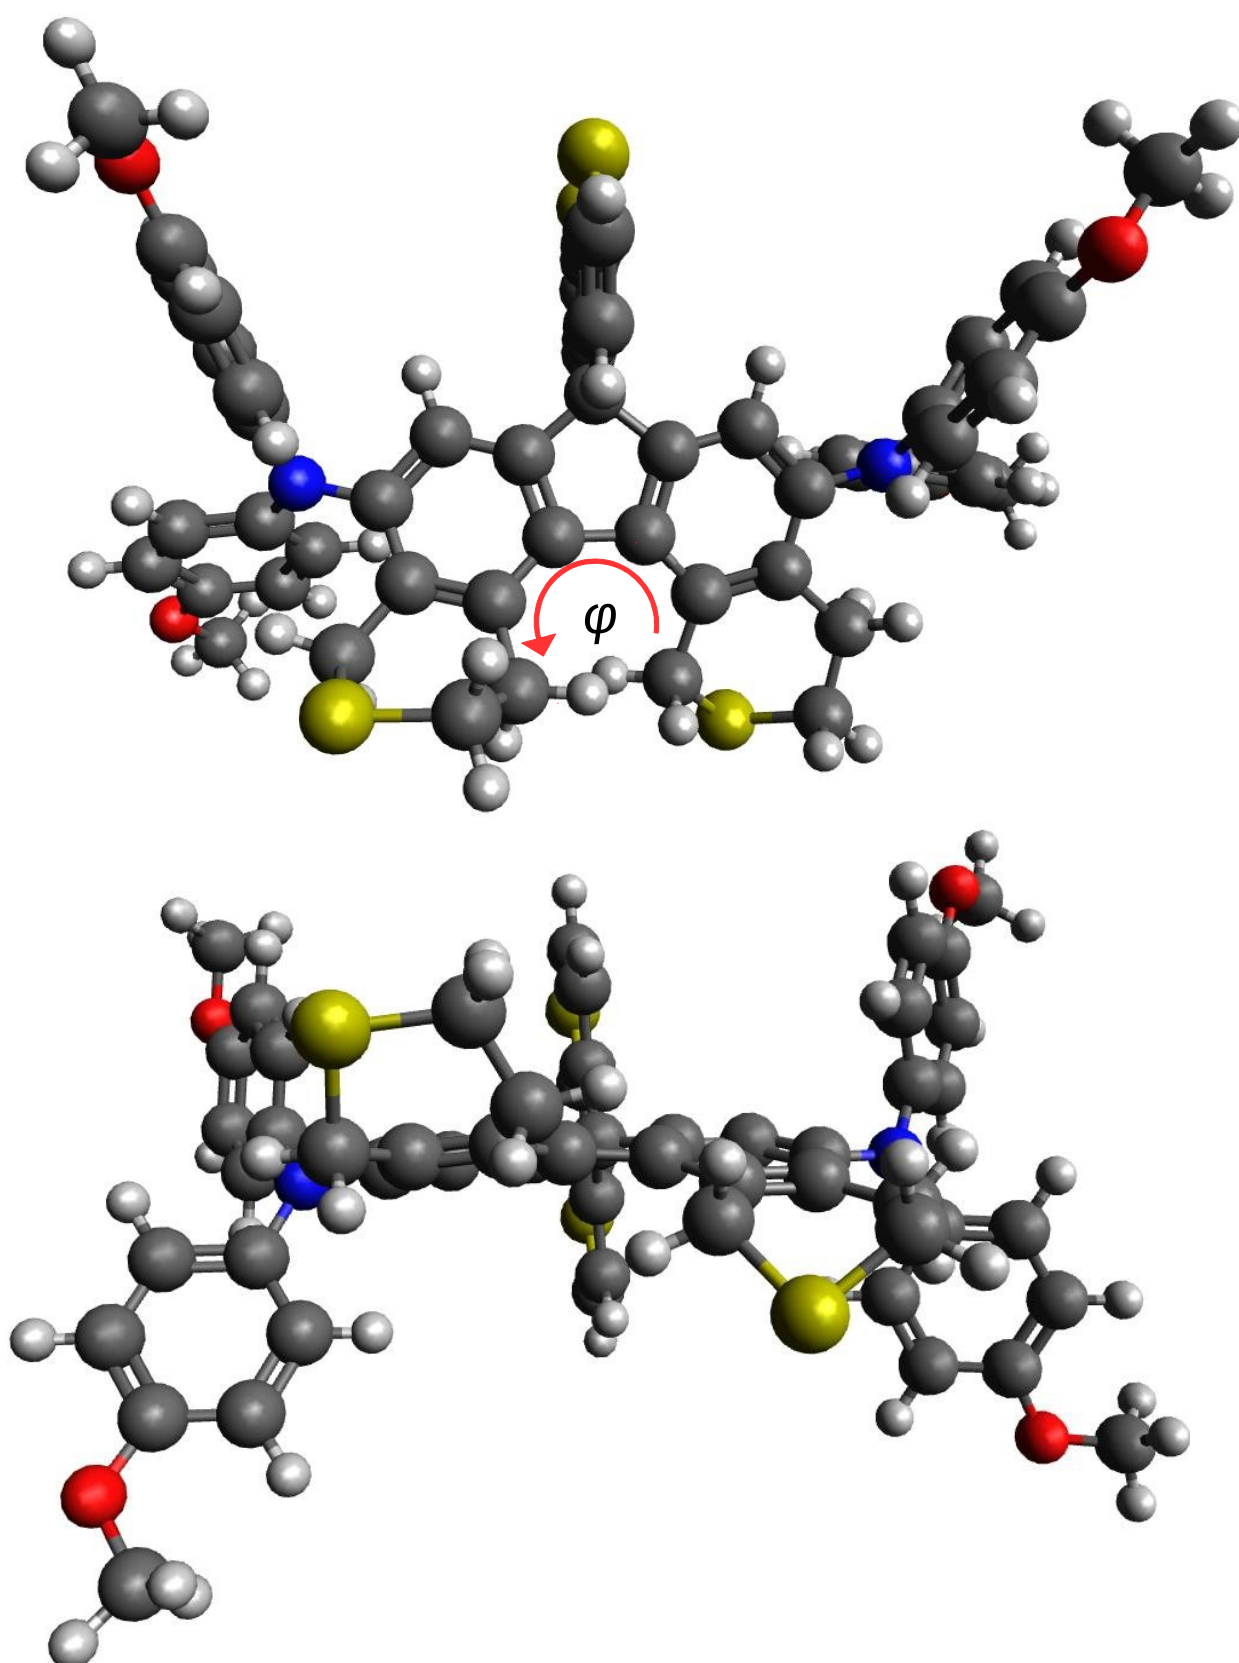

Supplement: d4cp01317d1.zip [file d4cp01317d1.zip]

FDT-6

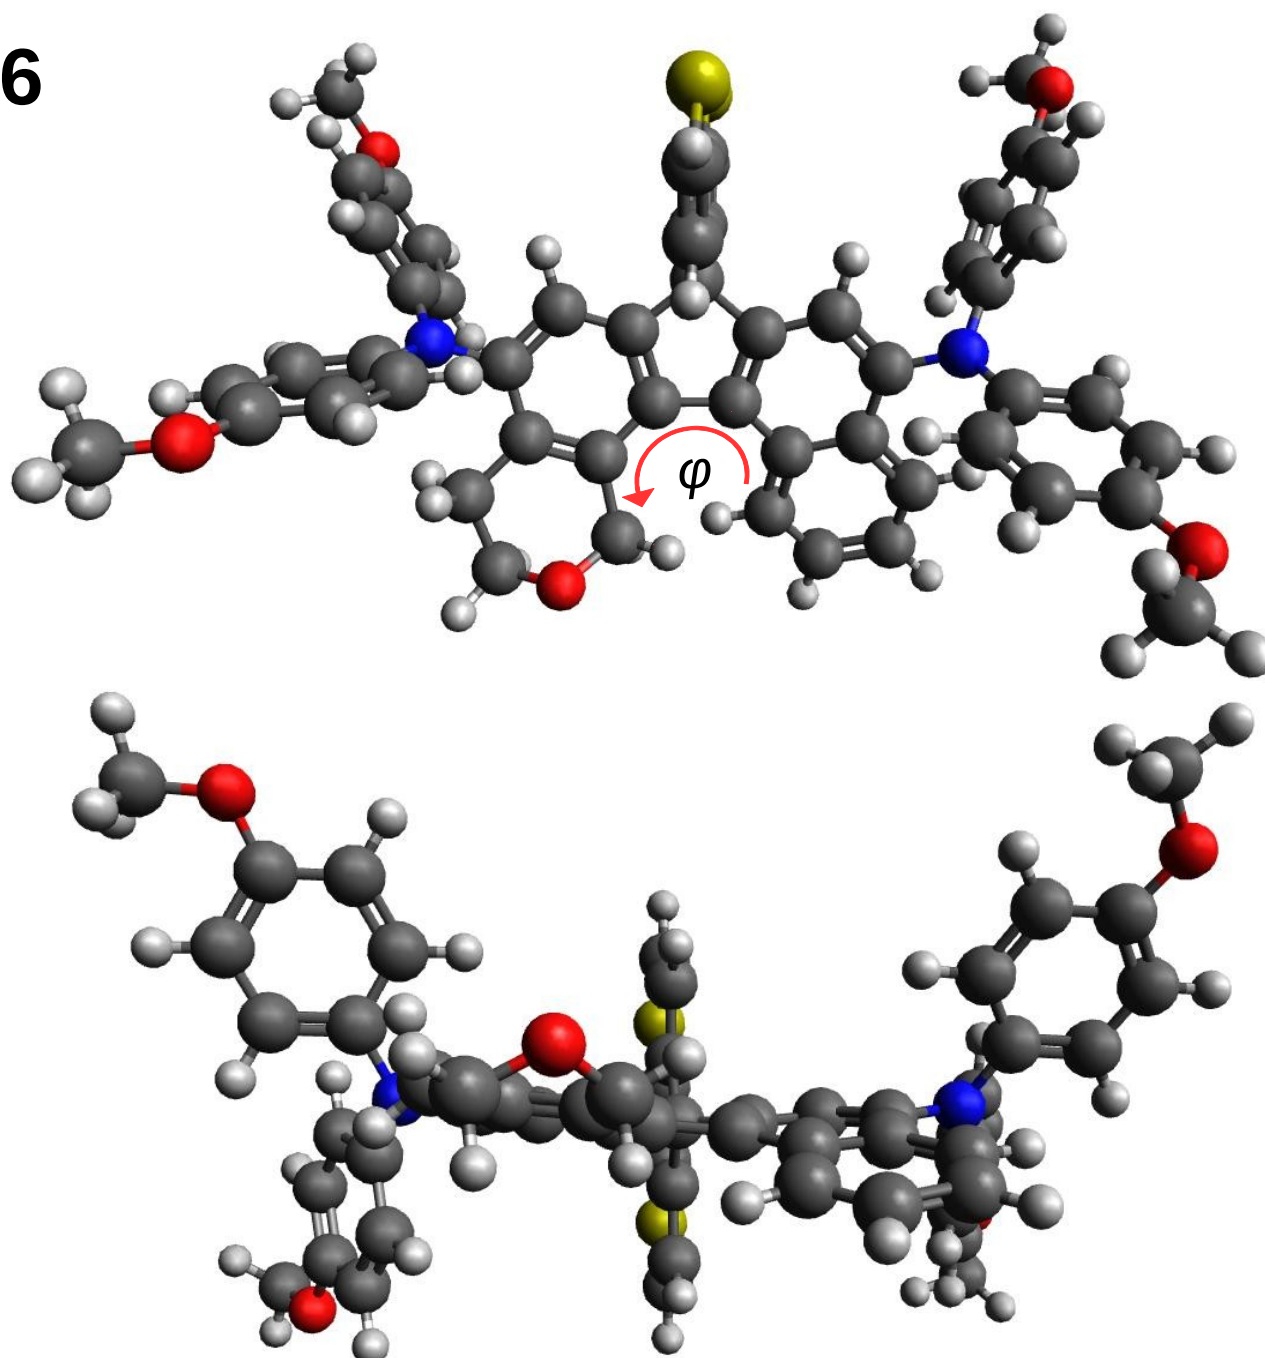

FDT-7

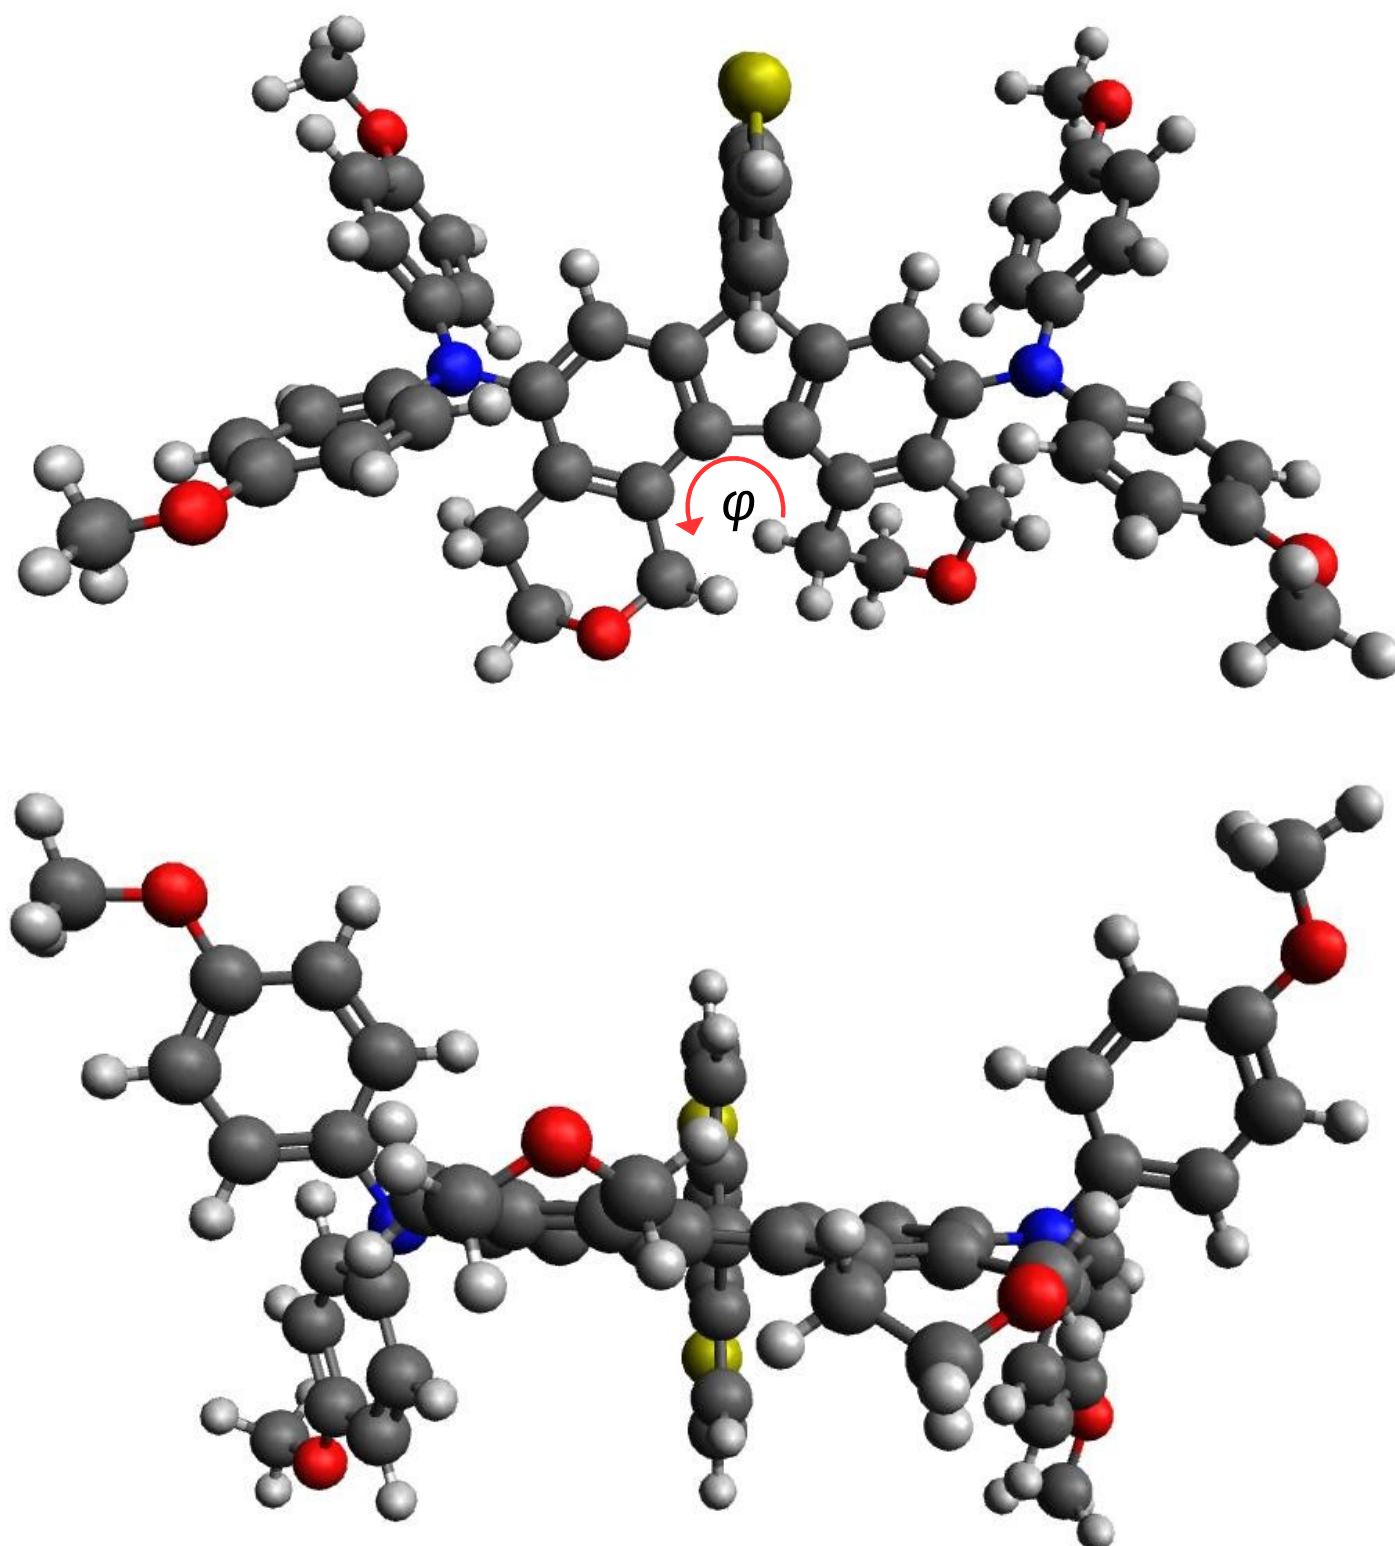

Supplement: d4cp01317d1.zip [file d4cp01317d1.zip]

**FDT-3**

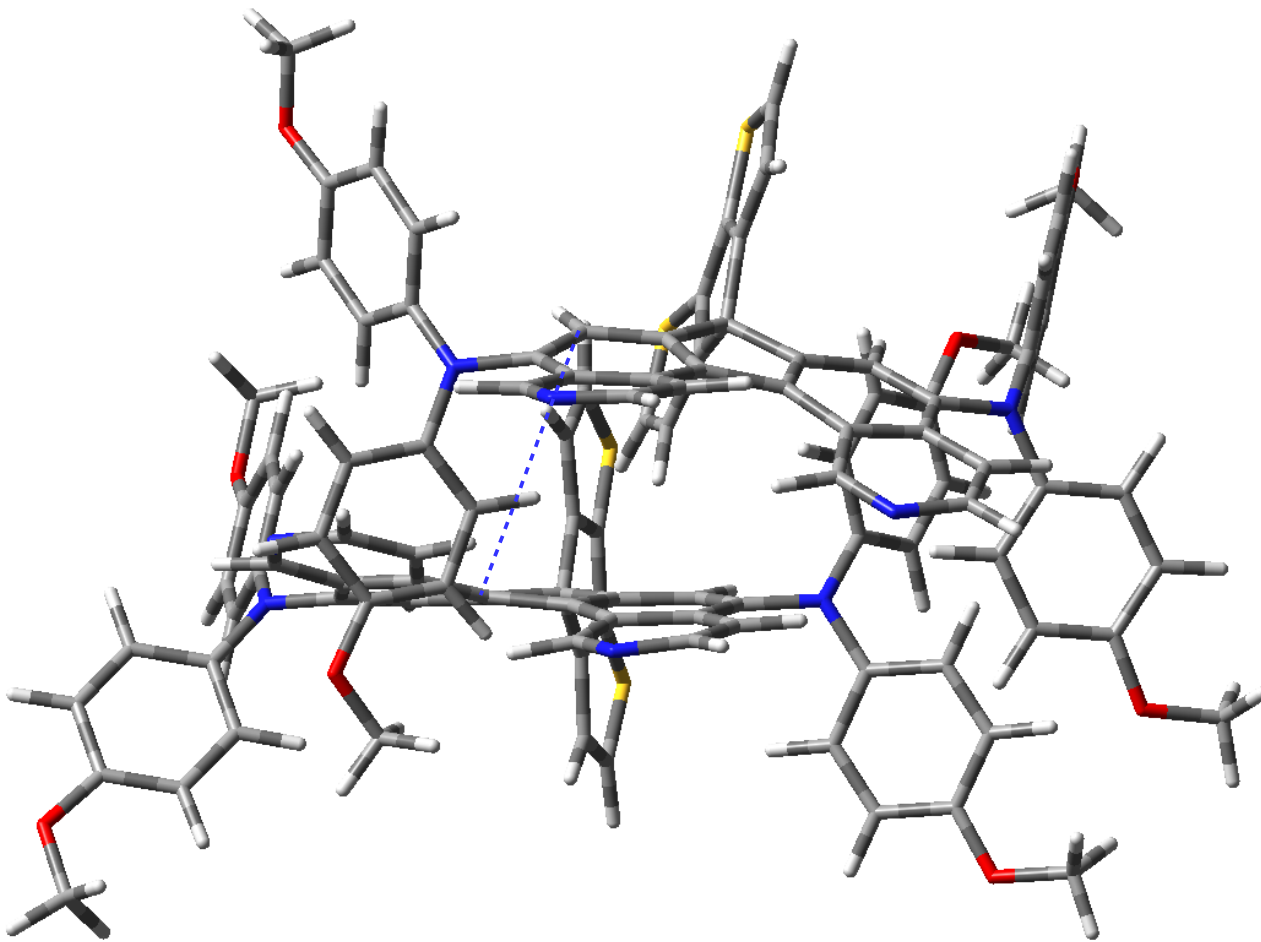

**FDT-4**

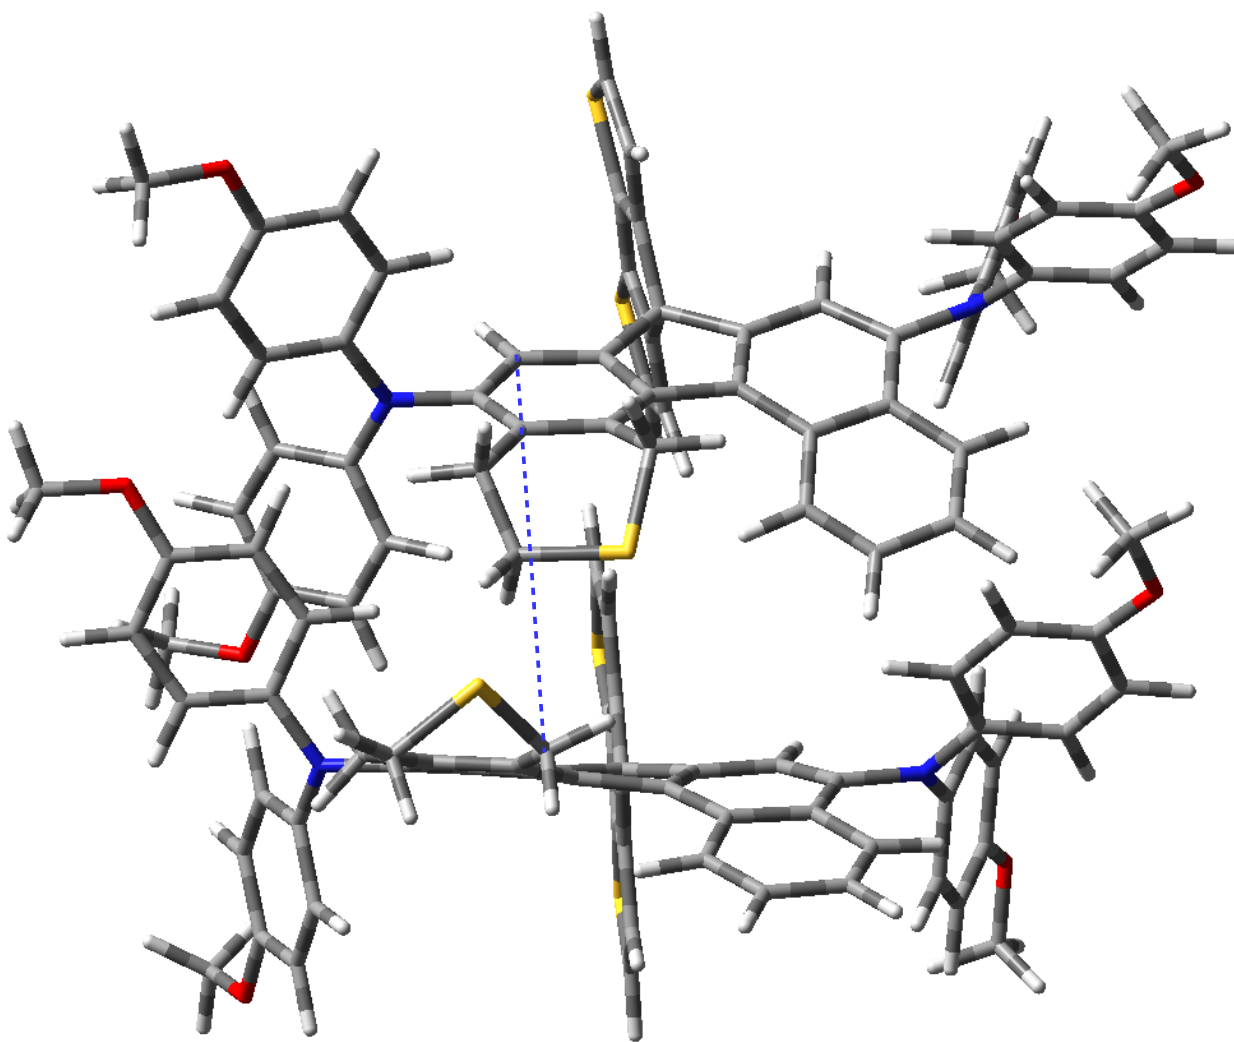

**FDT-5**

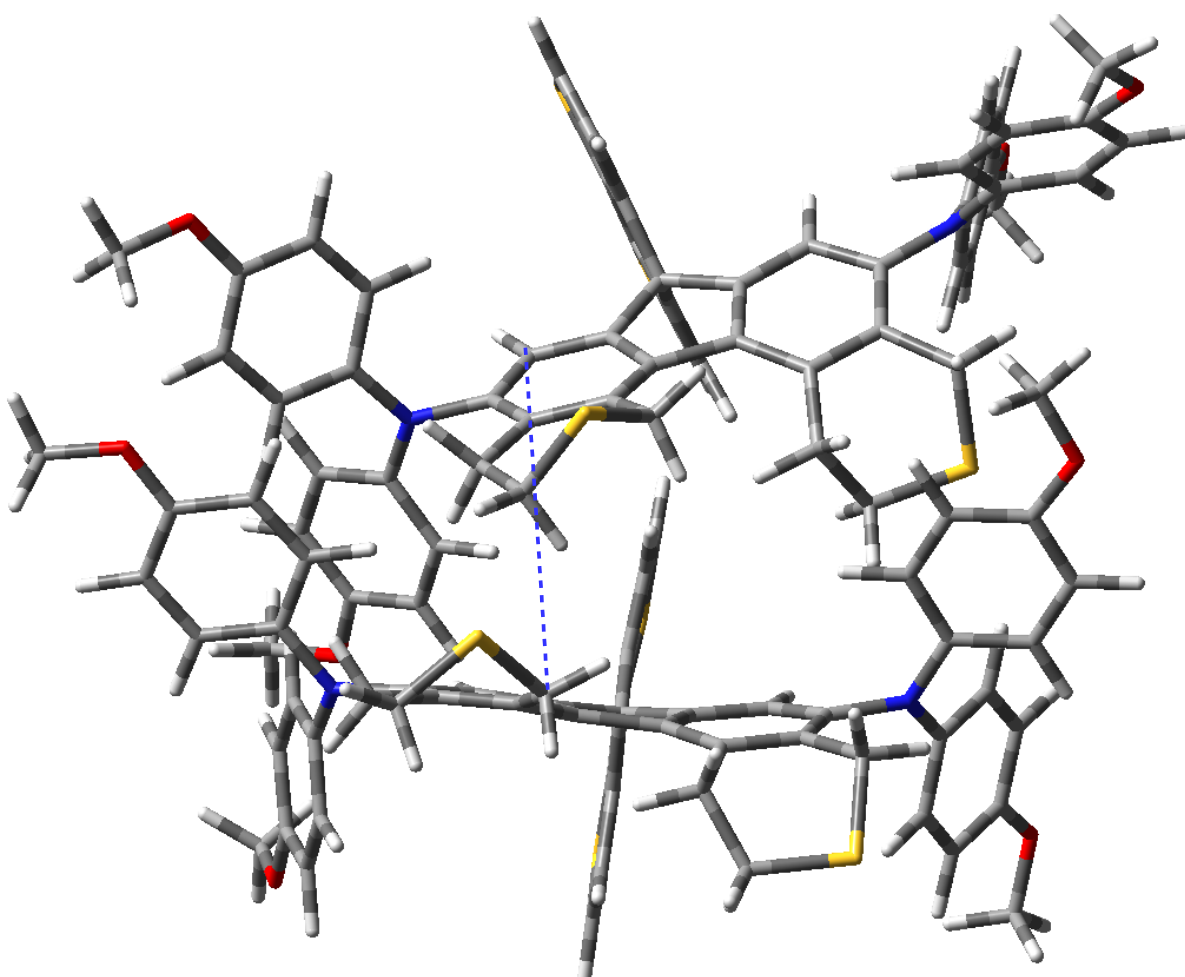

Supplement: d4cp01317d1.zip [file d4cp01317d1.zip]

## HOMO

## LUMO

FDT-4

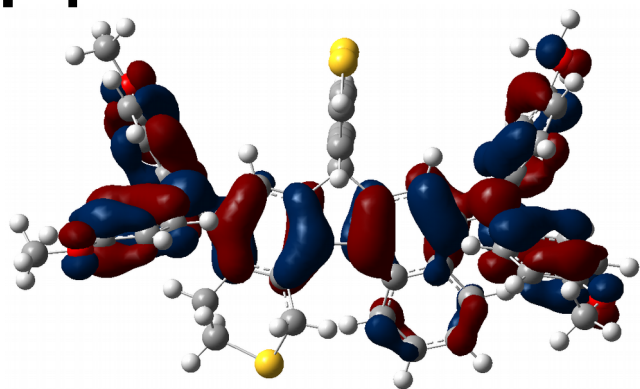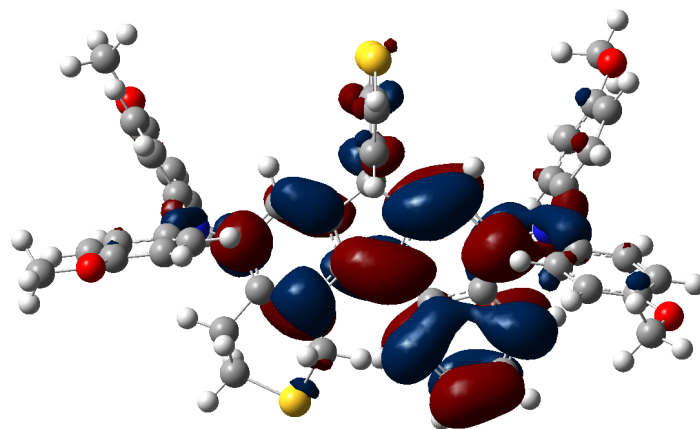

FDT-5

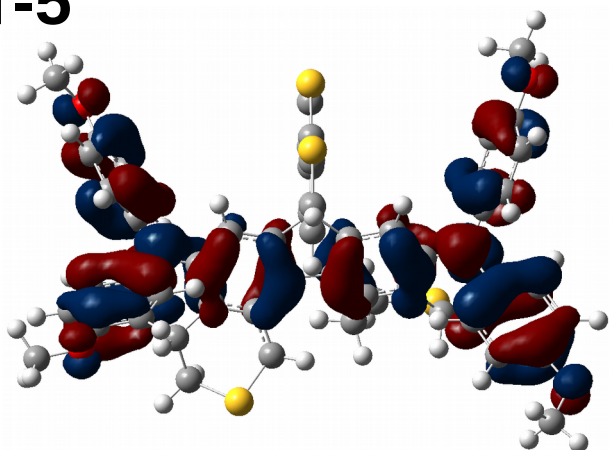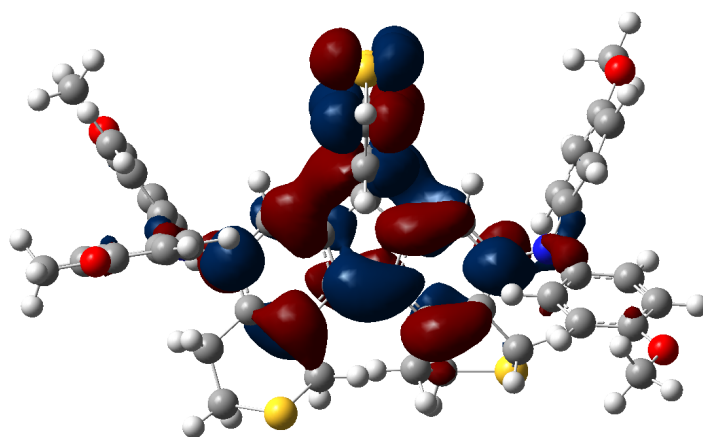

FDT-6

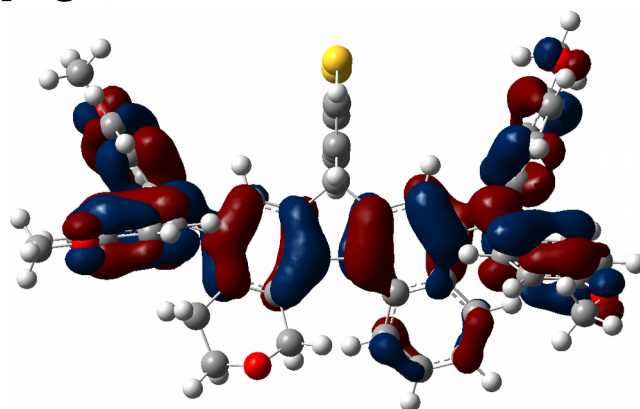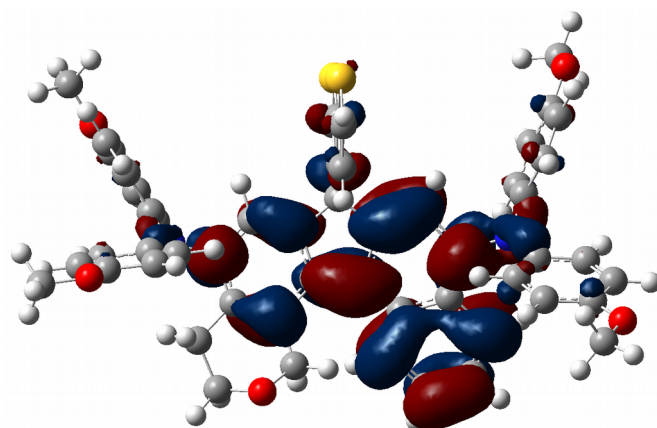

FDT-7

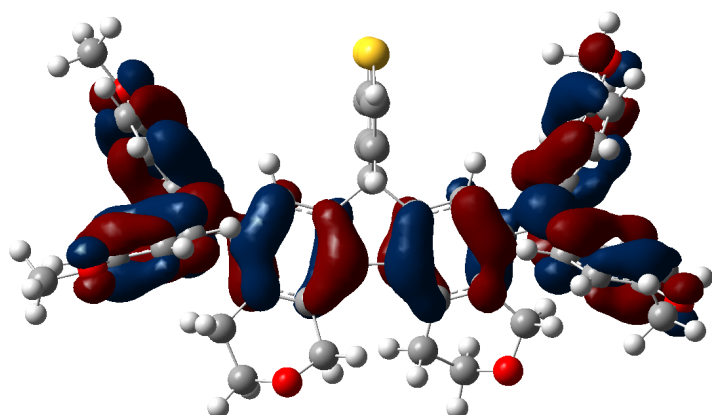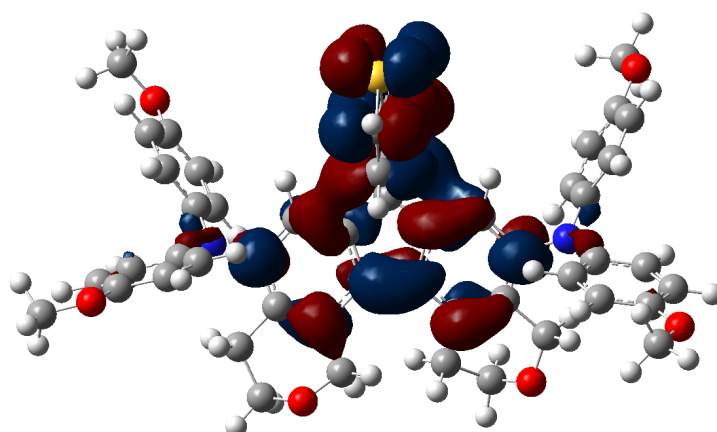

Supplement: d4cp01317d1.zip [file d4cp01317d1.zip]

**FDT-6**

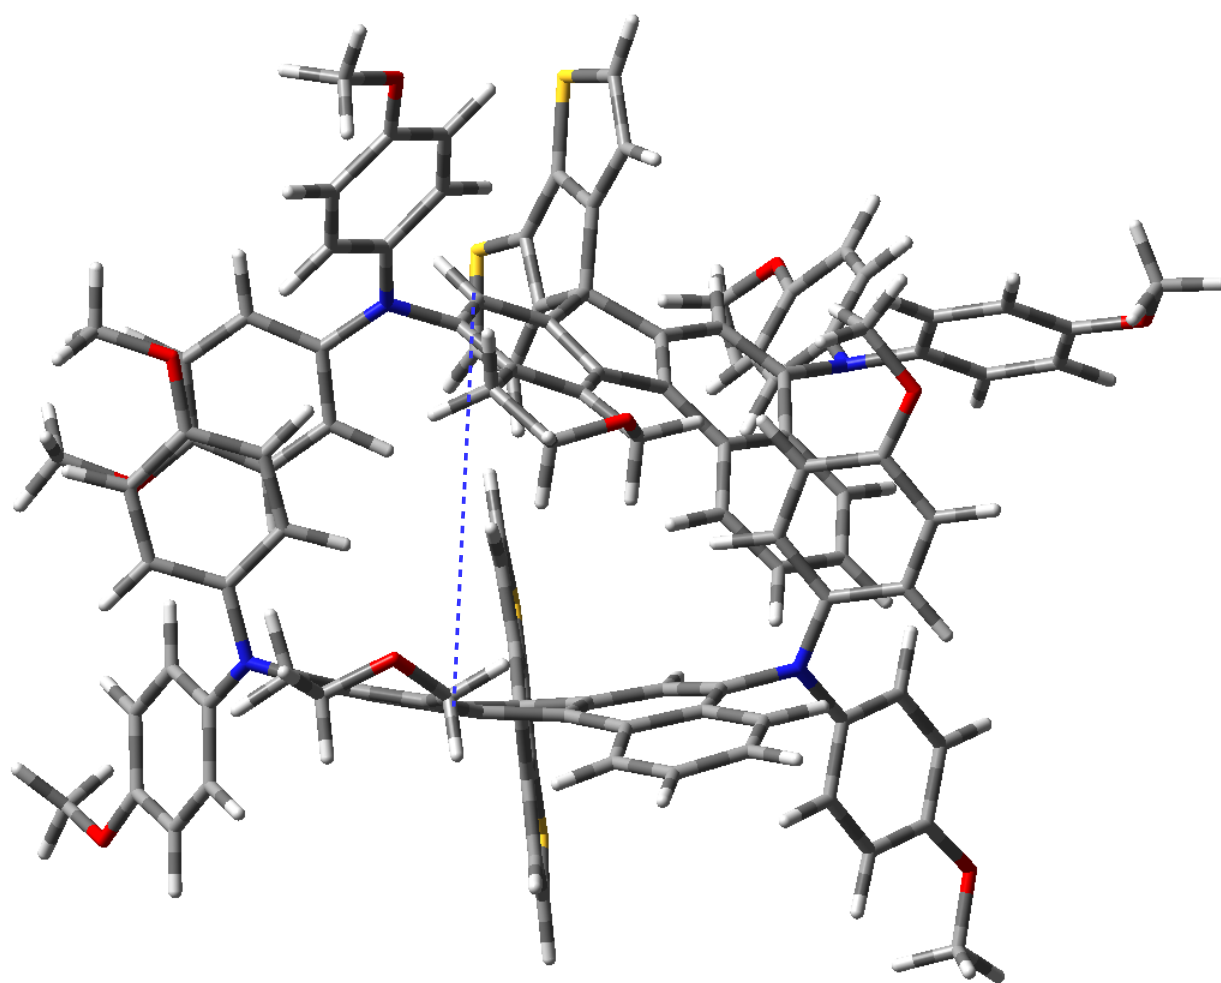

**FDT-7**

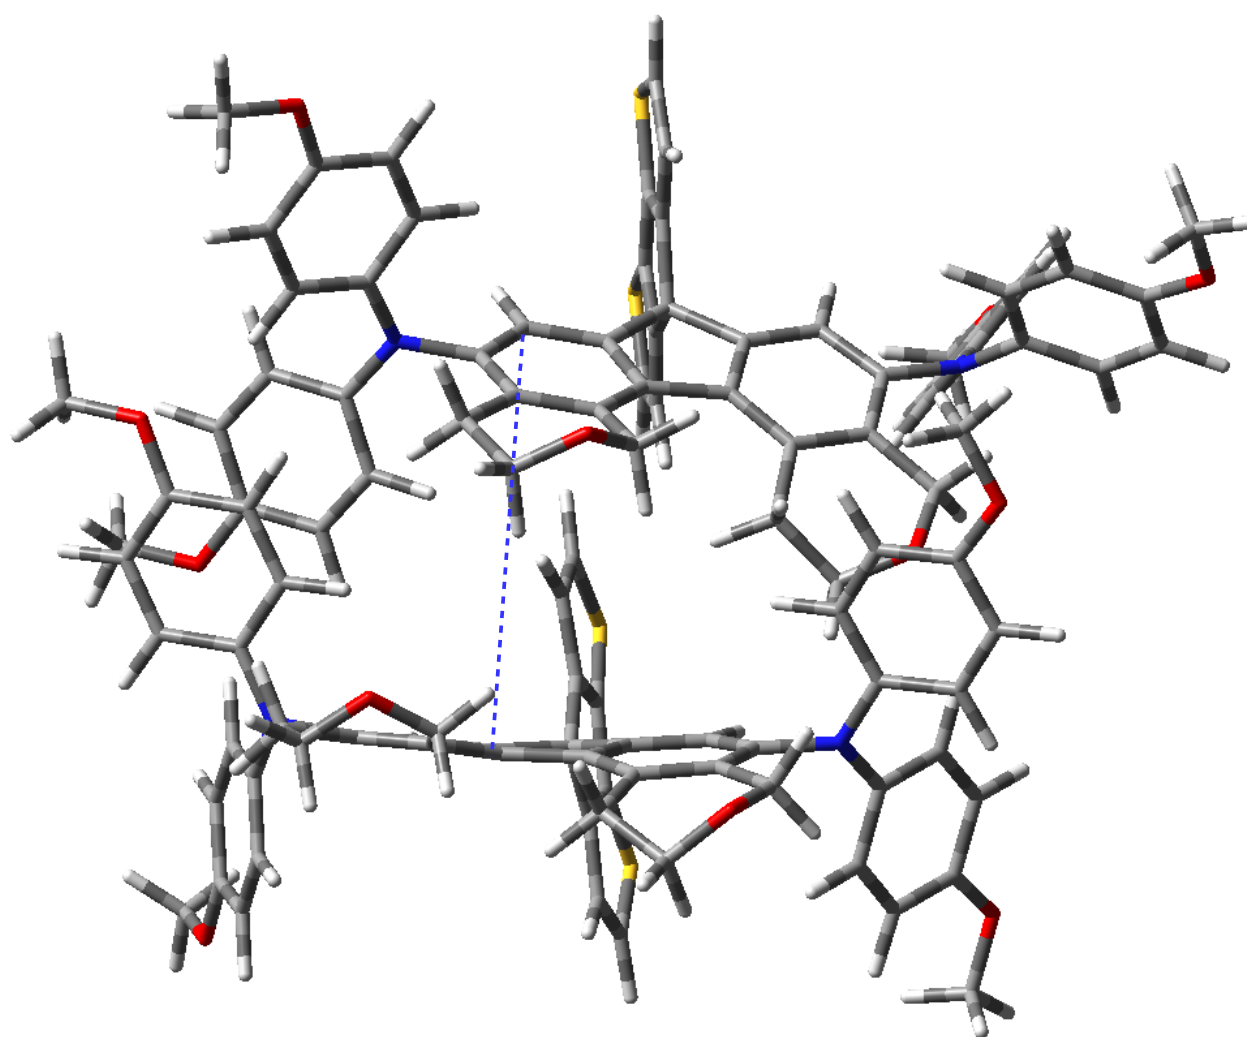

Supplement: d4cp01317d1.zip [file d4cp01317d1.zip]

## FDT-2

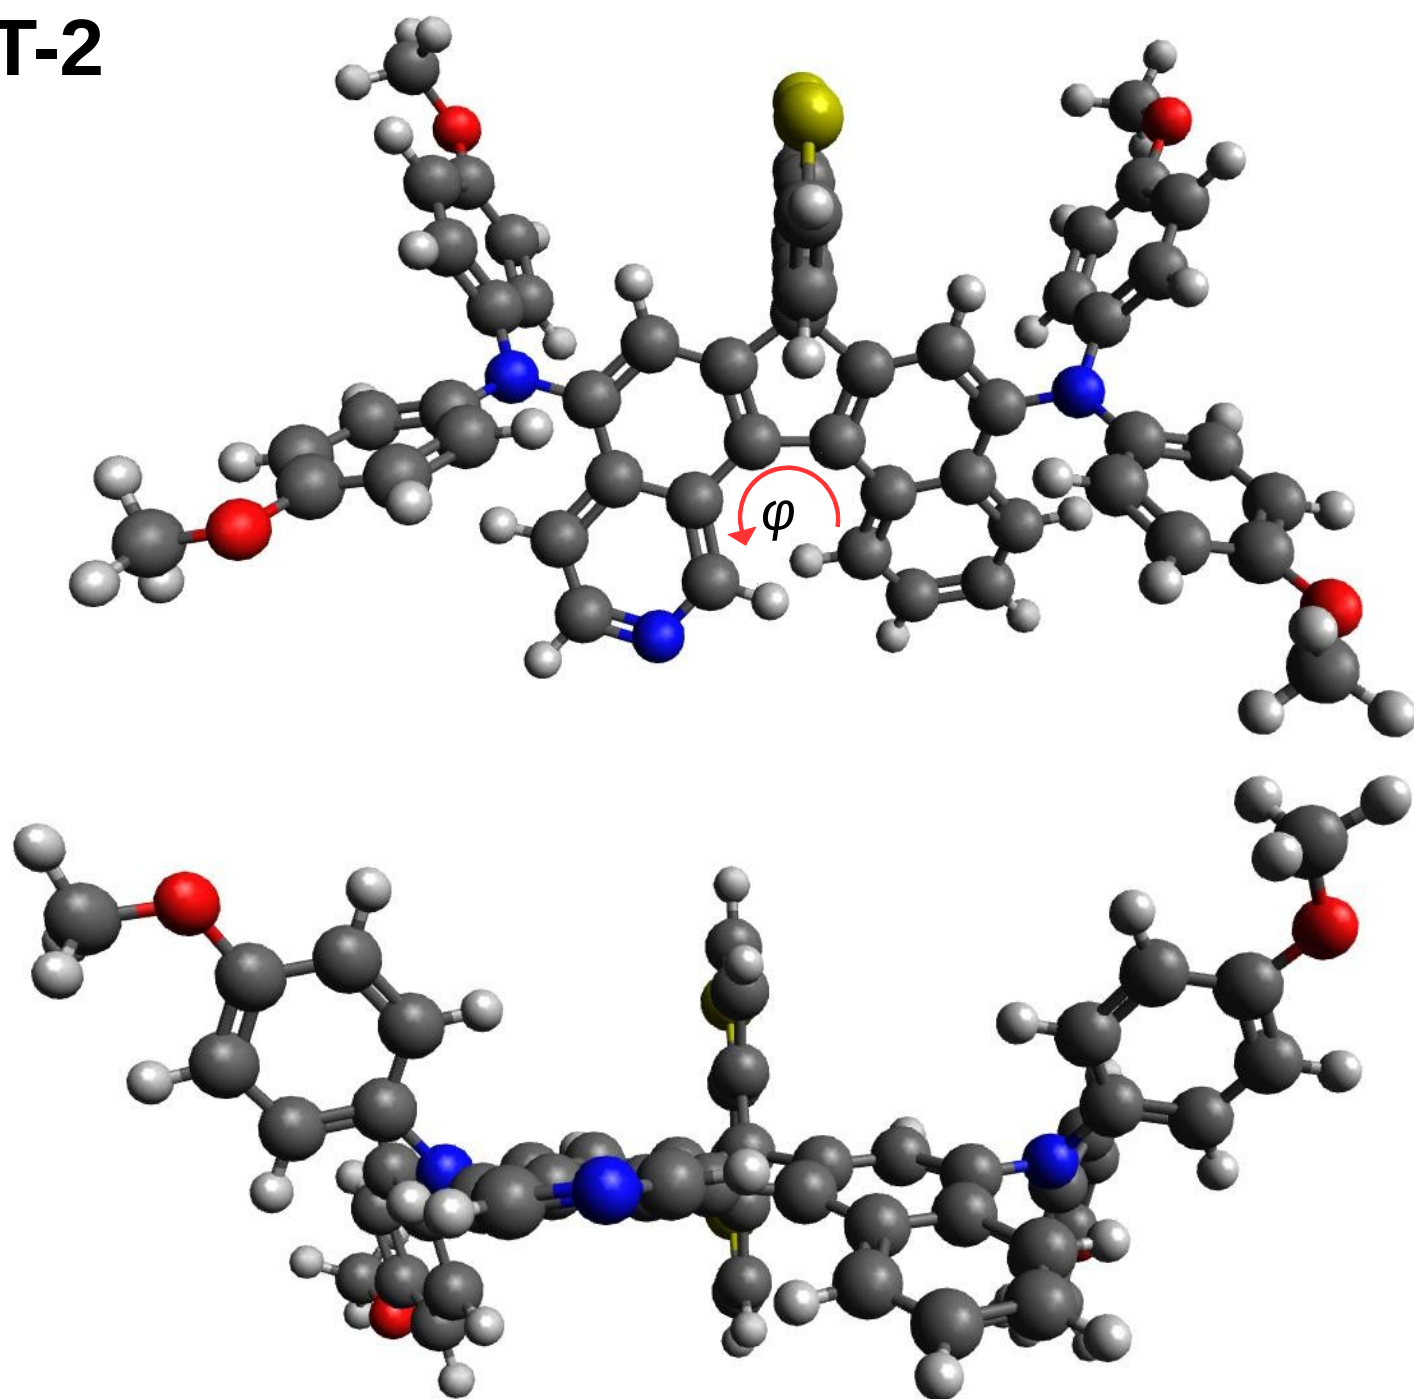

## FDT-3

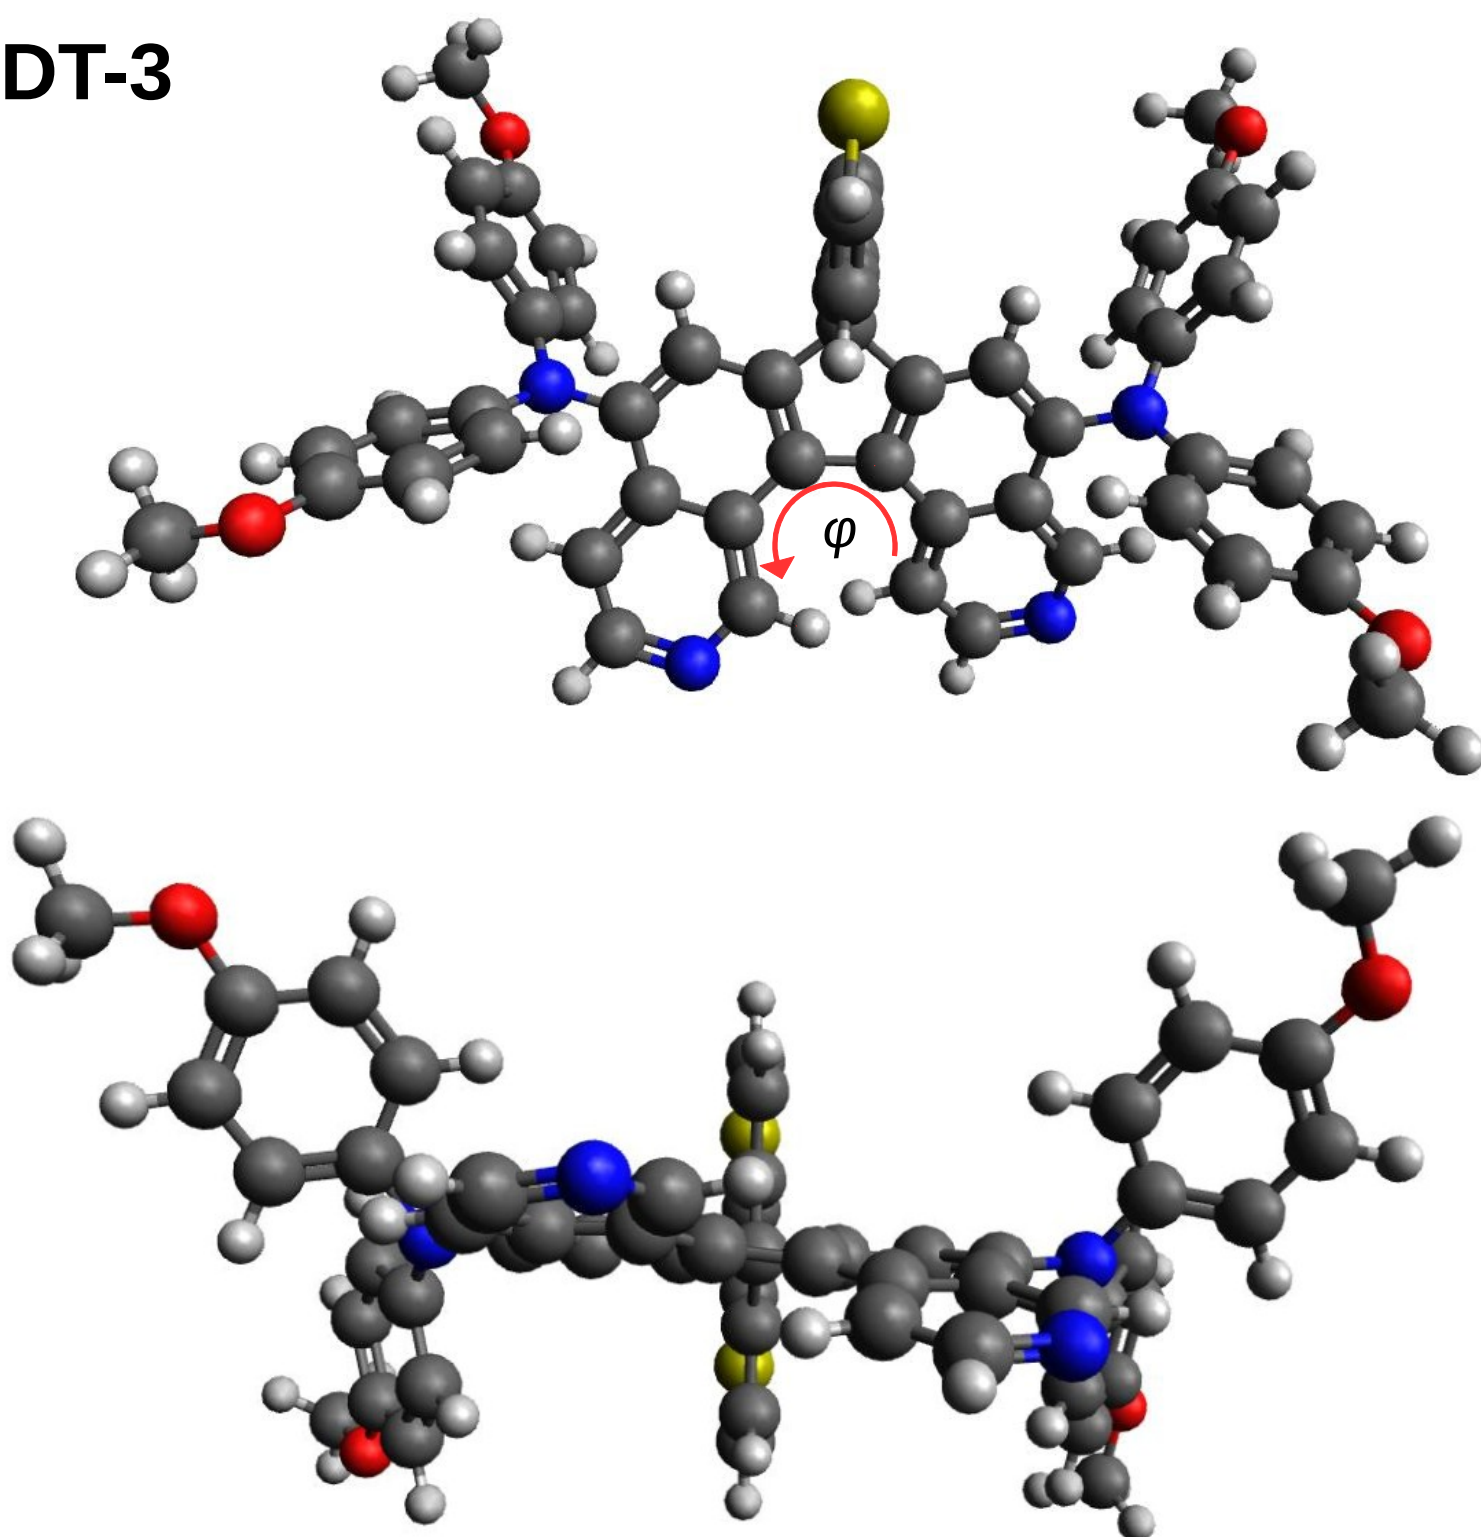

Supplement: d4cp01317d1.zip [file d4cp01317d1.zip]
